# Supplementary material for: Protandim Protects Oligodendrocytes against an Oxidative Insult
Source: PubMed Central journal article supplement (PMC5039579; doi:10.3390/antiox5030030), 2016-09-07
Supplement: antioxidants-05-00030-s001.pdf [file antioxidants-05-00030-s001.pdf]

# Supplementary Materials: Protandim Protects Oligodendrocytes against an Oxidative Insult

Jamie L. Lim, Susanne M. A. van der Pol, Wia Baron, Joe M. McCord, Helga E. de Vries, and Jack van Horsen

**Table S1.** Antibody characterization.

| Antibody             | Immunogen                                                                                                                                          | Source                                                                             | Dilution                   |
|----------------------|----------------------------------------------------------------------------------------------------------------------------------------------------|------------------------------------------------------------------------------------|----------------------------|
| Anti-MBP             | Bovine MBP                                                                                                                                         | Abd serotec, catalog no. MCA409S, RRID:AB_325004, rat, monoclonal                  | 1:200<br>(fluorescence/WB) |
| Anti-Olig2           | Recombinant mouse Olig-2                                                                                                                           | Chemicon, catalog no. AB9610, RRID:AB_570666, rabbit, polyclonal                   | 1:200<br>(fluorescence)    |
| Anti-HO-1            | Native rat liver HO-1 (Hsp32) protein                                                                                                              | Enzo Life Sciences, catalog no. ADI-OSA-150F, RRID:AB_1505620, rabbit, polyclonal  | 1:1000<br>(WB)             |
| Anti-NQO-1           | Recombinant full-length protein of human NQO-1                                                                                                     | Abcam, catalog no. ab28947, RRID:AB_881738, mouse, monoclonal                      | 1:1000<br>(WB)             |
| Anti-p62/SQSTM1      | Recombinant full length protein, corresponding to amino acids 1-441 of Human SQSTM1/p62                                                            | Abcam, catalog no. ab56416, RRID:AB_945626, mouse, monoclonal                      | 1:1000<br>(WB)             |
| Anti- $\beta$ -actin | Slightly modified $\beta$ -cytoplasmic actin N-terminal peptide, Ac-Asp-Asp-Asp-Ile-Ala-Ala-Leu-Val-Ile-Asp-Asn-Gly-Ser-Gly-Lys, conjugated to KLH | Sigma Aldrich, catalog no. A5441, RRID:AB_476744, mouse, monoclonal                | 1:5000<br>(WB)             |
| Anti-rat 488         | IgG (H+L) secondary antibody, Alexa-Fluor 488 conjugate                                                                                            | Thermo Fischer Scientific, catalog no. A-11006, RRID:AB_10561520, goat, polyclonal | 1:200<br>(fluorescence)    |
| Anti-rabbit 555      | IgG (H1L) secondary antibody, Alexa-Fluor 555 conjugate                                                                                            | Thermo Fischer Scientific, catalog no. A-21428, RRID:AB_2535849, goat, polyclonal  | 1:200<br>(fluorescence)    |

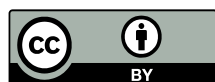

© 2016 by the authors; licensee MDPI, Basel, Switzerland. This article is an open access article distributed under the terms and conditions of the Creative Commons by Attribution (CC-BY) license (<http://creativecommons.org/licenses/by/4.0/>).
